# Supplementary material
Source: publisher figshare collection journal article supplement (https://sage.figshare.com/ndownloader/files/12753611)
Supplement: Supplementary file 1 [file 12753611]

# Association of *DFNA5*, *SYK* & *NELL1* variants along with HPV infection in oral cancer among the prolonged tobacco-chewers

Sharbadeb Kundu<sup>1</sup>, Vijayalakshmi Ramshankar<sup>4</sup>, Akalesh Kumar Verma<sup>3</sup>, Soundara Viveka Thangaraj<sup>4</sup>, Arvind Krishnamurthy<sup>5</sup>, Rajeev Kumar<sup>6</sup>, Ravi Kannan<sup>6</sup>, Sankar Kumar Ghosh<sup>1,2\*</sup>

## Supplementary Information

The **Additional File 1.pdf** file contains the *Supplementary Tables* viz. Supplementary Table S1 to Supplementary Table S5. The **Additional File 2.pdf** file contains the *Supplementary Figures* viz. Supplementary Figure S1 to Supplementary Figure S4. The table titles as well as the figure captions are mentioned below.

### Supplementary Tables

#### Additional File 1

**Supplementary Table S1.** List of populations taken under this study

**Supplementary Table S2.** List of primers used in the targeted re-sequencing experiment

**Supplementary Table S3** List of 115 significant SNPs associated with oral cancer obtained from "Discovery Set" samples

**Supplementary Table S4.** List of SNPs distributed in four pools for Sequenom experiment

**Supplementary Table S5.** Overall summary of the strongly associated SNPs obtained for **Case1** and **Case2** after stratified analysis

### Supplementary Figures

#### Additional file 2

**Supplementary Figure S1 Immunohistochemistry study of the case1 and case2 groups.** Here, BSA was used as negative control and cervical cancer tissue specimen was considered as the positive control for the Immunohistochemistry study.

**Supplementary Figure S2. Representative LD plot from Haploview software.** (A) LD plot for chromosome 11 [ $r^2 = 0.975$  for LD Block 1], (B) LD plot for chromosome 9 [ $r^2 > 0.8$  for LD Block 1] and (C) LD plot for chromosome 7 [ $r^2 < 0.8$  for LD Block 1 and  $r^2 \geq 0.8$  for LD Block 2]. The figure is not to scale.

**Supplementary Figure S3. Estimated population structure for 12 Northeast Indian heterogeneous ethnic groups taken under this study.** (A) Estimation of the number of clusters (K) by Delta-K method (Ref. 31). (B) The clustering (for K=3) was done based on major language families, which are labeled above the figure. The individual populations are numbered below the figure.

**Supplementary Figure S4. Top 10 interacting chemicals with *DFNA5* gene.** The red arrow signifies the chemical results in *increased expression* and the green arrow signifies the chemical results in *decreased expression* of the gene.
